# Supplementary material for: In vivo regulation of infected and bystander monocyte phenotype by the Mycobacterium marinum ESX-1 type VII secretion system
Source: Research Square preprint supplement (doi:10.21203/rs.3.rs-4999318/v1), 2024-10-16
Supplement: Supplementary file 1 [file 54437c7c6c93a95e6f08947e.docx]

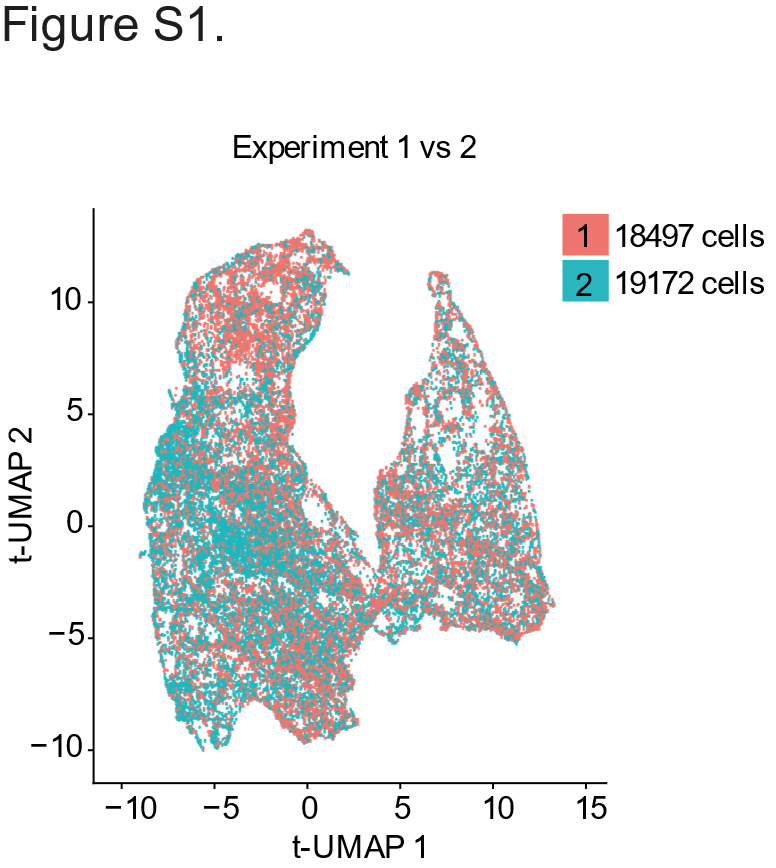


**Supplementary Figure S1. Consistent representation of Ly6C+MHCII+CD64+ myeloid cells in tUMAP across two independent experiments.** (**A**) tUMAP visualization of scRNA-seq data obtained from infected and bystander Ly6C+MHCII+CD64+ myeloid cells depicting the number and location of cells from two independent experiments**.**

**Supplementary Table S1. Total DEGs for infected versus bystander cells.** Average log fold change >0.5, p-value <0.05, consistent across the two experiments.

**Supplementary Table S2.** **Total DEGs for WT/EspK versus ΔRD1 infected cells.** Average log fold change >0.5, p-value <0.05, consistent across the two experiments.

**Supplementary Table S3. Total DEGs for WT versus ΔRD1 bystander cells.** Average log fold change >0.5, p-value <0.05, consistent across the two experiments.
