# Supplementary material for: In vivo regulation of infected and bystander monocyte phenotype by the Mycobacterium marinum ESX-1 type VII secretion system
Source: Research Square preprint supplement (doi:10.21203/rs.3.rs-4999318/v1), 2024-10-16
Supplement: Supplementary file 2 [file 77e9ca1d893b265209e560b9.xlsx]

## Sheet: Infected
Gene	Model	Cluster
AA467197	Infected	0
Arg1	Infected	0
Cd14	Infected	0
Cd200	Infected	0
Cd24a	Infected	0
Cd300lf	Infected	0
Cd63	Infected	0
Cd9	Infected	0
Clec4d	Infected	0
Ctsb	Infected	0
Ctsk	Infected	0
Ctsl	Infected	0
Ctss	Infected	0
Cxcl3	Infected	0
Emp1	Infected	0
Fabp5	Infected	0
Fth1	Infected	0
Gde1	Infected	0
Gpnmb	Infected	0
H2-M2	Infected	0
Hilpda	Infected	0
Il1a	Infected	0
Il1rn	Infected	0
Il7r	Infected	0
Inhba	Infected	0
Lgals3	Infected	0
Lilr4b	Infected	0
Mmp12	Infected	0
Ms4a7	Infected	0
Nos2	Infected	0
Pdpn	Infected	0
Phlda1	Infected	0
Plin2	Infected	0
Plk2	Infected	0
Plpp3	Infected	0
Pmp22	Infected	0
Ptges	Infected	0
Rgcc	Infected	0
Rgs1	Infected	0
Rsad2	Infected	0
S100a8	Infected	0
Sdc1	Infected	0
Sgk1	Infected	0
Slpi	Infected	0
Spp1	Infected	0
AA467197	Infected	1
Acsl1	Infected	1
Arg1	Infected	1
Ccl3	Infected	1
Ccl4	Infected	1
Ccl5	Infected	1
Cd24a	Infected	1
Cd274	Infected	1
Cd63	Infected	1
Cd9	Infected	1
Clec4d	Infected	1
Clec4e	Infected	1
Clec4n	Infected	1
Clic4	Infected	1
Cstb	Infected	1
Ctsd	Infected	1
Ctss	Infected	1
Cxcl16	Infected	1
Cxcl2	Infected	1
Egr1	Infected	1
F10	Infected	1
Fabp5	Infected	1
Fth1	Infected	1
Gde1	Infected	1
Grina	Infected	1
Hilpda	Infected	1
Hmox1	Infected	1
Id2	Infected	1
Ier3	Infected	1
Il1a	Infected	1
Il1rn	Infected	1
Inhba	Infected	1
Irg1	Infected	1
Lilr4b	Infected	1
Mmp12	Infected	1
Ms4a7	Infected	1
Nampt	Infected	1
Nos2	Infected	1
Plk2	Infected	1
Prdx1	Infected	1
Ptges	Infected	1
Rgs1	Infected	1
Sdc4	Infected	1
Slamf7	Infected	1
Slc7a11	Infected	1
Slpi	Infected	1
Spp1	Infected	1
AA467197	Infected	2
Acsl1	Infected	2
Adam8	Infected	2
Anpep	Infected	2
Arg1	Infected	2
Basp1	Infected	2
Bcl2a1b	Infected	2
Bnip3	Infected	2
Ccl5	Infected	2
Ccrl2	Infected	2
Cd14	Infected	2
Cd24a	Infected	2
Cd36	Infected	2
Cd63	Infected	2
Cd9	Infected	2
Clec4d	Infected	2
Clec4e	Infected	2
Clec4n	Infected	2
Clic4	Infected	2
Creg1	Infected	2
Cstb	Infected	2
Ctsb	Infected	2
Ctsd	Infected	2
Cxcl16	Infected	2
Cxcl2	Infected	2
Ero1l	Infected	2
Esd	Infected	2
F10	Infected	2
Fabp5	Infected	2
Fam162a	Infected	2
Fth1	Infected	2
Gde1	Infected	2
Gpnmb	Infected	2
Grina	Infected	2
Hilpda	Infected	2
Hmox1	Infected	2
Id2	Infected	2
Ier3	Infected	2
Il1a	Infected	2
Il1rn	Infected	2
Il7r	Infected	2
Inhba	Infected	2
Irg1	Infected	2
Lgals3	Infected	2
Lgmn	Infected	2
Lilr4b	Infected	2
Malt1	Infected	2
Mdm2	Infected	2
Mif	Infected	2
Mmp12	Infected	2
Ms4a7	Infected	2
Nampt	Infected	2
Ninj1	Infected	2
Nos2	Infected	2
Pdpn	Infected	2
Pgam1	Infected	2
Plin2	Infected	2
Plk2	Infected	2
Prdx1	Infected	2
Prdx6	Infected	2
Procr	Infected	2
Ptges	Infected	2
Ptgs2	Infected	2
Rgs1	Infected	2
Rnf149	Infected	2
Sdc1	Infected	2
Sdc4	Infected	2
Sgk1	Infected	2
Slamf7	Infected	2
Slc16a3	Infected	2
Slc7a11	Infected	2
Slc7a2	Infected	2
Slpi	Infected	2
Spp1	Infected	2
Tpi1	Infected	2
Trem2	Infected	2
Cd200	Infected	3
Cxcl1	Infected	3
Fabp5	Infected	3
Mmp12	Infected	3
Mmp13	Infected	3
Pdpn	Infected	3
Phlda1	Infected	3
Ptges	Infected	3
Tnfsf15	Infected	3
AA467197	Infected	4
Acsl1	Infected	4
Adam8	Infected	4
Anpep	Infected	4
Arg1	Infected	4
Atp6v1e1	Infected	4
Basp1	Infected	4
Bcl2a1b	Infected	4
Bnip3	Infected	4
Bnip3l	Infected	4
Ccl5	Infected	4
Ccrl2	Infected	4
Cd24a	Infected	4
Cd300lf	Infected	4
Cd63	Infected	4
Cd9	Infected	4
Clec4d	Infected	4
Clec4e	Infected	4
Clec4n	Infected	4
Creg1	Infected	4
Cstb	Infected	4
Ctsb	Infected	4
Ctsd	Infected	4
Ctsl	Infected	4
Ctss	Infected	4
Cxcl16	Infected	4
Esd	Infected	4
F10	Infected	4
Fabp5	Infected	4
Fth1	Infected	4
Gde1	Infected	4
Gpnmb	Infected	4
Grina	Infected	4
Hgsnat	Infected	4
Hilpda	Infected	4
Hmox1	Infected	4
Id2	Infected	4
Il1a	Infected	4
Il1rn	Infected	4
Il7r	Infected	4
Inhba	Infected	4
Lgals3	Infected	4
Lilr4b	Infected	4
Mdm2	Infected	4
Mmp12	Infected	4
Ms4a7	Infected	4
Nos2	Infected	4
Npy	Infected	4
Nrp2	Infected	4
Pdpn	Infected	4
Plin2	Infected	4
Pmp22	Infected	4
Prdx1	Infected	4
Prdx6	Infected	4
Psap	Infected	4
Ptges	Infected	4
Ptgs2	Infected	4
Rgs1	Infected	4
Rnf149	Infected	4
Rsad2	Infected	4
S100a8	Infected	4
Sdc1	Infected	4
Sgk1	Infected	4
Slamf7	Infected	4
Slc7a11	Infected	4
Slpi	Infected	4
Sod2	Infected	4
Spp1	Infected	4
Ubd	Infected	4
AA467197	Infected	5
Acsl1	Infected	5
Adam8	Infected	5
Anpep	Infected	5
Arg1	Infected	5
Atp6v1e1	Infected	5
Basp1	Infected	5
Bcl2a1b	Infected	5
Bnip3	Infected	5
Cav1	Infected	5
Cd14	Infected	5
Cd24a	Infected	5
Cd300lf	Infected	5
Cd63	Infected	5
Cd9	Infected	5
Clec4d	Infected	5
Clec4e	Infected	5
Clec4n	Infected	5
Cpd	Infected	5
Cpeb4	Infected	5
Cstb	Infected	5
Ctsb	Infected	5
Ctsd	Infected	5
Ctsl	Infected	5
Ctss	Infected	5
Cxcl16	Infected	5
Cxcl2	Infected	5
Cyb5a	Infected	5
Dst	Infected	5
Emp1	Infected	5
Esd	Infected	5
F10	Infected	5
Fabp5	Infected	5
Fam20c	Infected	5
Fnip2	Infected	5
Fth1	Infected	5
Gde1	Infected	5
Gpnmb	Infected	5
Grina	Infected	5
Hilpda	Infected	5
Hmox1	Infected	5
Id2	Infected	5
Il1rn	Infected	5
Il7r	Infected	5
Inhba	Infected	5
Lgals3	Infected	5
Lilr4b	Infected	5
Met	Infected	5
Mmp12	Infected	5
Ms4a7	Infected	5
Nos2	Infected	5
Nrp2	Infected	5
Pdpn	Infected	5
Plin2	Infected	5
Plk2	Infected	5
Plpp3	Infected	5
Pmp22	Infected	5
Prdx1	Infected	5
Prdx6	Infected	5
Psap	Infected	5
Ptges	Infected	5
Ptgs2	Infected	5
Rgcc	Infected	5
Rgs1	Infected	5
Rnf149	Infected	5
Rsad2	Infected	5
Sdc1	Infected	5
Sgk1	Infected	5
Slamf7	Infected	5
Slc7a11	Infected	5
Slc7a2	Infected	5
Slpi	Infected	5
Spp1	Infected	5
Tbc1d9	Infected	5
Trem2	Infected	5
Vat1	Infected	5
Mmp12	Infected	6

## Sheet: Bystander
Gene	Model	Cluster
Aif1	Bystander	0
C1qa	Bystander	0
C1qb	Bystander	0
C1qc	Bystander	0
Ccl2	Bystander	0
Ccl5	Bystander	0
Ccl6	Bystander	0
Ccl7	Bystander	0
Ccr2	Bystander	0
Cdk2ap2	Bystander	0
Coro1a	Bystander	0
Ctsc	Bystander	0
Cxcl10	Bystander	0
Cxcl9	Bystander	0
Eef1a1	Bystander	0
Fam26f	Bystander	0
Gmfg	Bystander	0
Ifitm2	Bystander	0
Ifitm3	Bystander	0
Klra2	Bystander	0
Lsp1	Bystander	0
Ly6c2	Bystander	0
Ly6e	Bystander	0
Lyz2	Bystander	0
Magohb	Bystander	0
Ms4a4c	Bystander	0
Ms4a6b	Bystander	0
Ms4a6c	Bystander	0
Naaa	Bystander	0
Plac8	Bystander	0
Plbd1	Bystander	0
Pld4	Bystander	0
Ptpn18	Bystander	0
Rnase6	Bystander	0
Rpl10a	Bystander	0
Rpl14	Bystander	0
Rpl17	Bystander	0
Rpl3	Bystander	0
Rpl34	Bystander	0
Rpl35a	Bystander	0
Rpl37	Bystander	0
Rps11	Bystander	0
Rps15a	Bystander	0
Rps18	Bystander	0
Rps27a	Bystander	0
Rps4x	Bystander	0
Rps7	Bystander	0
Rpsa	Bystander	0
Vasp	Bystander	0
Zyx	Bystander	0
Coro1a	Bystander	1
Id3	Bystander	1
Ly86	Bystander	1
Napsa	Bystander	1
Tmsb10	Bystander	1
Ccl6	Bystander	2
Ccr2	Bystander	2
Coro1a	Bystander	2
Ifitm2	Bystander	2
Ifitm3	Bystander	2
Ifngr1	Bystander	2
Klrk1	Bystander	2
Lsp1	Bystander	2
Ly86	Bystander	2
Magohb	Bystander	2
Ms4a4c	Bystander	2
Ms4a6b	Bystander	2
Napsa	Bystander	2
Plac8	Bystander	2
Pld4	Bystander	2
Ptpn18	Bystander	2
Rnase6	Bystander	2
Tmsb10	Bystander	2
C1qb	Bystander	3
Coro1a	Bystander	3
Ctsc	Bystander	3
H2-DMa	Bystander	3
Ifitm2	Bystander	3
Ly6e	Bystander	3
Lyz2	Bystander	3
Mgst1	Bystander	3
Ms4a6c	Bystander	3
Plac8	Bystander	3
Psmb8	Bystander	3
Tgfbi	Bystander	3
C1qa	Bystander	4
C1qb	Bystander	4
C1qc	Bystander	4
Ccl12	Bystander	4
Ccl6	Bystander	4
Ccl7	Bystander	4
Ccr2	Bystander	4
Cdk2ap2	Bystander	4
Coro1a	Bystander	4
Crip1	Bystander	4
Eef1a1	Bystander	4
Gbp2b	Bystander	4
H2afz	Bystander	4
Hspa8	Bystander	4
Ifi27l2a	Bystander	4
Ifitm2	Bystander	4
Ifitm3	Bystander	4
Lsp1	Bystander	4
Ly6e	Bystander	4
Ly86	Bystander	4
Ms4a4c	Bystander	4
Ms4a6b	Bystander	4
Naaa	Bystander	4
Plac8	Bystander	4
Plbd1	Bystander	4
Pld4	Bystander	4
Pltp	Bystander	4
Ptpn18	Bystander	4
Rnase6	Bystander	4
Rpl10a	Bystander	4
Rpl14	Bystander	4
Rpl3	Bystander	4
Rpl6	Bystander	4
Rps11	Bystander	4
Rps7	Bystander	4
Sepp1	Bystander	4
Tppp3	Bystander	4
Tuba1a	Bystander	4
Actg1	Bystander	5
Aif1	Bystander	5
Alox5ap	Bystander	5
Arhgdib	Bystander	5
Atp5g2	Bystander	5
C1qa	Bystander	5
C1qb	Bystander	5
Ccl6	Bystander	5
Ccr2	Bystander	5
Cdk2ap2	Bystander	5
Clec4a3	Bystander	5
Coro1a	Bystander	5
Cotl1	Bystander	5
Crip1	Bystander	5
Cst3	Bystander	5
Ctsc	Bystander	5
Cytip	Bystander	5
Eef1a1	Bystander	5
Eef1b2	Bystander	5
Eef2	Bystander	5
Eif3f	Bystander	5
Fam26f	Bystander	5
Gnb2l1	Bystander	5
Gpx1	Bystander	5
H2afz	Bystander	5
H2-DMb1	Bystander	5
Hck	Bystander	5
Hint1	Bystander	5
Hspa8	Bystander	5
Id3	Bystander	5
Ifi27l2a	Bystander	5
Ifitm2	Bystander	5
Ifitm3	Bystander	5
Ifngr1	Bystander	5
Itga4	Bystander	5
Itgal	Bystander	5
Klf2	Bystander	5
Klra2	Bystander	5
Limd2	Bystander	5
Lpl	Bystander	5
Lsp1	Bystander	5
Lst1	Bystander	5
Ly6e	Bystander	5
Ly86	Bystander	5
Lyz2	Bystander	5
Magohb	Bystander	5
Ms4a4c	Bystander	5
Ms4a6b	Bystander	5
Ms4a6c	Bystander	5
Naaa	Bystander	5
Naca	Bystander	5
Ndufa4	Bystander	5
Nr4a1	Bystander	5
Plac8	Bystander	5
Plbd1	Bystander	5
Pld4	Bystander	5
Psmb8	Bystander	5
Ptpn18	Bystander	5
Rnase6	Bystander	5
Rpl10	Bystander	5
Rpl10a	Bystander	5
Rpl11	Bystander	5
Rpl12	Bystander	5
Rpl13	Bystander	5
Rpl14	Bystander	5
Rpl15	Bystander	5
Rpl17	Bystander	5
Rpl18	Bystander	5
Rpl18a	Bystander	5
Rpl21	Bystander	5
Rpl22l1	Bystander	5
Rpl27	Bystander	5
Rpl27a	Bystander	5
Rpl28	Bystander	5
Rpl3	Bystander	5
Rpl32	Bystander	5
Rpl34	Bystander	5
Rpl35	Bystander	5
Rpl35a	Bystander	5
Rpl36	Bystander	5
Rpl36a	Bystander	5
Rpl36al	Bystander	5
Rpl37	Bystander	5
Rpl38	Bystander	5
Rpl6	Bystander	5
Rpl9	Bystander	5
Rps10	Bystander	5
Rps11	Bystander	5
Rps13	Bystander	5
Rps15a	Bystander	5
Rps16	Bystander	5
Rps18	Bystander	5
Rps23	Bystander	5
Rps27a	Bystander	5
Rps4x	Bystander	5
Rps5	Bystander	5
Rps6	Bystander	5
Rps7	Bystander	5
Rps8	Bystander	5
Rps9	Bystander	5
Rpsa	Bystander	5
Sec61b	Bystander	5
Slc25a5	Bystander	5
Tppp3	Bystander	5
Plac8	Bystander	6
