# Supplementary material for: In vivo regulation of infected and bystander monocyte phenotype by the Mycobacterium marinum ESX-1 type VII secretion system
Source: Research Square preprint supplement (doi:10.21203/rs.3.rs-4999318/v1), 2024-10-16
Supplement: Supplementary file 3 [file b5aa5a70a4e136e325bb16c9.xlsx]

## Sheet: Blad1
Gene	Model	Cluster
Spp1	WT/EspK infected	3
Clec4n	WT/EspK infected	3
Spp1	WT/EspK infected	5
Cxcl2	WT/EspK infected	5
Rsad2	dRD1 infected	0
Rrbp1	dRD1 infected	0
Irf7	dRD1 infected	0
Crip1	dRD1 infected	2
Zyx	dRD1 infected	5
H2-T23	dRD1 infected	5
Gbp4	dRD1 infected	5
Rpl35	dRD1 infected	7
Tmsb10	dRD1 infected	7
