# Supplementary material for: In vivo regulation of infected and bystander monocyte phenotype by the Mycobacterium marinum ESX-1 type VII secretion system
Source: Research Square preprint supplement (doi:10.21203/rs.3.rs-4999318/v1), 2024-10-16
Supplement: Supplementary file 4 [file b5f8bf06cd6d544b98975ca5.xlsx]

## Sheet: Blad1
Gene	Model	Cluster
Apoe	WT_bystander	0
Cd14	WT_bystander	0
Cxcl2	WT_bystander	0
Fn1	WT_bystander	0
Ifitm1	WT_bystander	0
Il1b	WT_bystander	0
Inhba	WT_bystander	0
Mt1	WT_bystander	0
Saa3	WT_bystander	0
Spp1	WT_bystander	0
Thbs1	WT_bystander	0
Thbs1	WT_bystander	1
Apoe	WT_bystander	2
Cd14	WT_bystander	2
F13a1	WT_bystander	2
Ifitm1	WT_bystander	2
Il1b	WT_bystander	2
S100a8	WT_bystander	2
Saa3	WT_bystander	2
Thbs1	WT_bystander	2
Wfdc21	WT_bystander	2
Arg2	WT_bystander	3
Basp1	WT_bystander	3
Ccl3	WT_bystander	3
Ccl4	WT_bystander	3
Cd14	WT_bystander	3
Cd93	WT_bystander	3
Cxcl2	WT_bystander	3
Dusp5	WT_bystander	3
F13a1	WT_bystander	3
Fcgr2b	WT_bystander	3
Hcar2	WT_bystander	3
Ifitm1	WT_bystander	3
Il1a	WT_bystander	3
Il1rn	WT_bystander	3
Il7r	WT_bystander	3
Inhba	WT_bystander	3
Lrrfip2	WT_bystander	3
Ndrg1	WT_bystander	3
Nfkbia	WT_bystander	3
Phlda1	WT_bystander	3
Plin2	WT_bystander	3
Ptgs2	WT_bystander	3
Smox	WT_bystander	3
Spp1	WT_bystander	3
Srgn	WT_bystander	3
Zeb2	WT_bystander	3
Apoe	WT_bystander	4
Ccl5	WT_bystander	4
Dab2	WT_bystander	4
F13a1	WT_bystander	4
Fn1	WT_bystander	4
Il1b	WT_bystander	4
Lst1	WT_bystander	4
Mt1	WT_bystander	4
Pf4	WT_bystander	4
Saa3	WT_bystander	4
Thbs1	WT_bystander	4
Arg1	WT_bystander	5
Basp1	WT_bystander	5
Cd14	WT_bystander	5
Dab2	WT_bystander	5
F13a1	WT_bystander	5
Ifitm1	WT_bystander	5
Il1b	WT_bystander	5
Il1rn	WT_bystander	5
Saa3	WT_bystander	5
Slpi	WT_bystander	5
Spp1	WT_bystander	5
Thbs1	WT_bystander	5
Cd14	WT_bystander	6
Cd93	WT_bystander	6
Dab2	WT_bystander	6
F13a1	WT_bystander	6
Hilpda	WT_bystander	6
Il1rn	WT_bystander	6
Inhba	WT_bystander	6
Pdpn	WT_bystander	6
Spp1	WT_bystander	6
Atp1b3	dRD1_bystander	0
Ccl2	dRD1_bystander	0
Gbp2	dRD1_bystander	0
Zyx	dRD1_bystander	0
Atp1b3	dRD1_bystander	2
Irf7	dRD1_bystander	2
Lpl	dRD1_bystander	2
Rnaseh2b	dRD1_bystander	2
Zyx	dRD1_bystander	2
Blvrb	dRD1_bystander	3
Cd302	dRD1_bystander	3
Cfb	dRD1_bystander	3
Cxcl10	dRD1_bystander	3
Gbp2	dRD1_bystander	3
Gbp3	dRD1_bystander	3
Gbp4	dRD1_bystander	3
Gmfg	dRD1_bystander	3
H2afz	dRD1_bystander	3
Hint1	dRD1_bystander	3
Ifi30	dRD1_bystander	3
Ly6a	dRD1_bystander	3
Mgst1	dRD1_bystander	3
Ndufa8	dRD1_bystander	3
Psmb10	dRD1_bystander	3
Rtp4	dRD1_bystander	3
Samhd1	dRD1_bystander	3
Stat1	dRD1_bystander	3
Tap1	dRD1_bystander	3
2810474O19Rik	dRD1_bystander	4
Atp1b3	dRD1_bystander	4
Cxcl10	dRD1_bystander	4
Gbp2	dRD1_bystander	4
Gbp2b	dRD1_bystander	4
Ifi205	dRD1_bystander	4
Irf7	dRD1_bystander	4
Irg1	dRD1_bystander	4
Lgals3	dRD1_bystander	4
Ly6c2	dRD1_bystander	4
Rtp4	dRD1_bystander	4
Serpina3g	dRD1_bystander	4
Tuba1a	dRD1_bystander	4
Zyx	dRD1_bystander	4
Atp1b3	dRD1_bystander	5
Cxcl10	dRD1_bystander	5
Gbp2	dRD1_bystander	5
Zyx	dRD1_bystander	5
BC028528	dRD1_bystander	6
Hint1	dRD1_bystander	6
Itm2b	dRD1_bystander	6
Mgst1	dRD1_bystander	6
Samhd1	dRD1_bystander	6
Tspo	dRD1_bystander	6
